# Supplementary material for: A Tailored and Engaging mHealth Gamified Framework for Nutritional Behaviour Change
Source: MDPI journal article supplement (doi:10.3390/nu15081950), 2023-04-18
Supplement: s1 [file s1]

**Table S1.** CarpeDiem modified Food Frequency Questionnaire (FFQ).

[illegible]



[illegible]
